# Supplementary material for: Fluorescence behaviour of an anthracene–BODIPY system affected by spin states of a dioxolene–cobalt centre
Source: Royal Society of Chemistry journal article supplement (doi:10.1039/c6dt00864j), 2016-01-01
Supplement: c6dt00864j1.pdf [file c6dt00864j1.pdf]

## **Fluorescence behaviour of an anthracene-BODIPY system affected by spin states of a dioxolene-cobalt centre**

Koichi Katayama, Masakazu Hirotsu,\* Akitaka Ito and Yoshio Teki\*

Division of Molecular Materials Science, Graduate School of Science,  
Osaka City University  
3-3-138 Sugimoto, Sumiyoshi-ku, Osaka 558-8585 (Japan)  
E-mail: [mhiro@sci.osaka-cu.ac.jp](mailto:mhiro@sci.osaka-cu.ac.jp); [teki@sci.osaka-cu.ac.jp](mailto:teki@sci.osaka-cu.ac.jp)

### **Supplementary Information Data**

IR spectra of complexes **1** and **2** and H<sub>2</sub>L, absorption spectra of H<sub>2</sub>L, cyclic voltammograms of **1**, **2**, **1'**, and **2'**, <sup>1</sup>H NMR spectra of **1**, **2** and **1'**, fluorescence spectra of **1'**, H<sub>2</sub>L and H<sub>2</sub>L', and <sup>1</sup>H NMR spectra of (i), (ii) and H<sub>2</sub>L are presented as supplementary information.

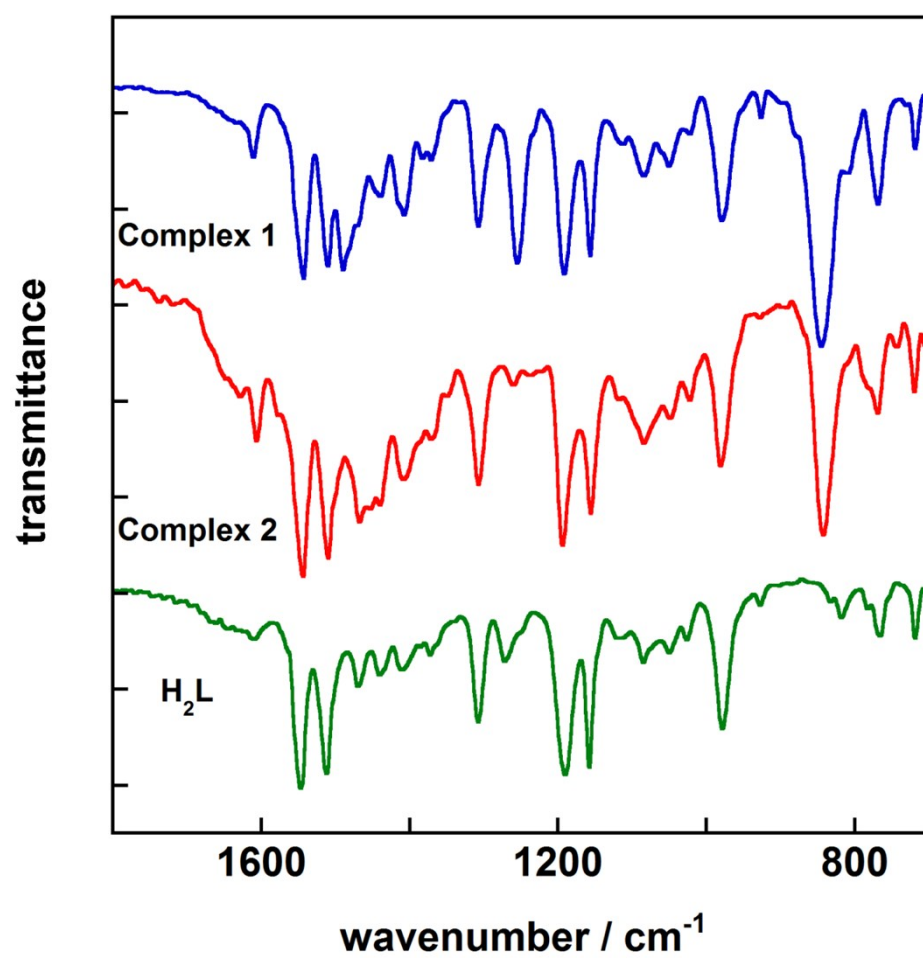

**Fig. S1** IR spectra of complexes **1** and **2** and H<sub>2</sub>L.

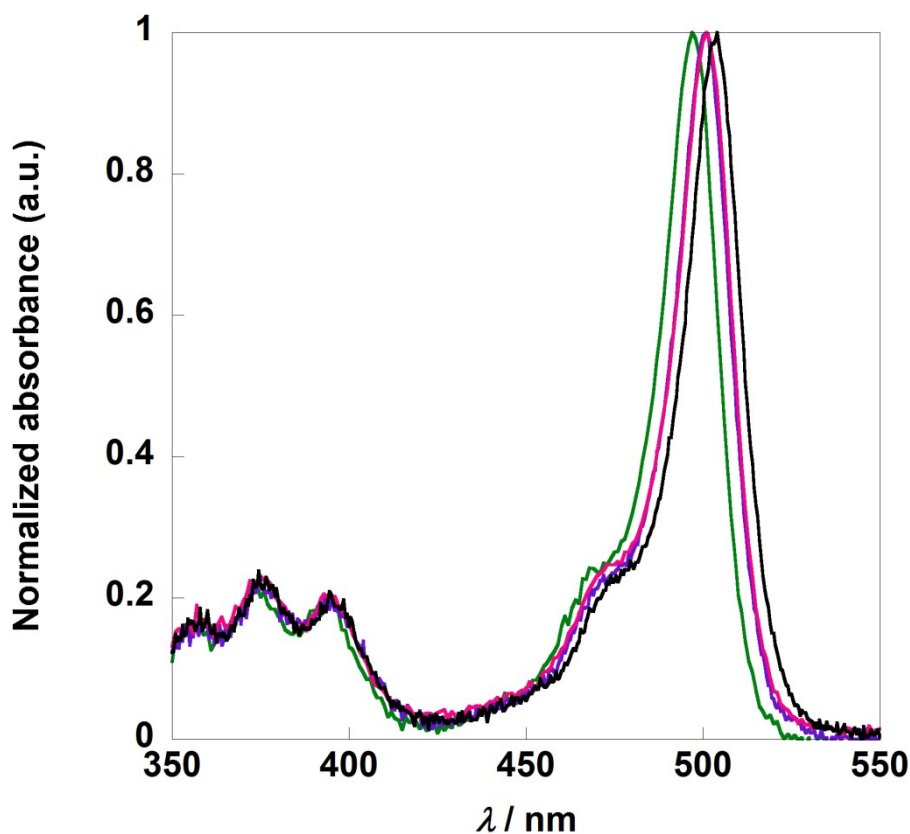

**Fig. S2** Normalized absorption spectra of H<sub>2</sub>L in several solutions: CH<sub>3</sub>CN, (—); CH<sub>2</sub>Cl<sub>2</sub>, (—); toluene, (—); THF, (—).

**Table S1** Photophysical properties of H<sub>2</sub>L, and complexes **1** and **2** in several solvents.

|                  |                                 | $\lambda_{\text{abs}}$ (max/nm) <sup>a</sup> | $\lambda_{\text{abs}}$ (max/nm) <sup>b</sup> | $\lambda_{\text{em}}$ (max/nm) | $\Phi_{\text{ex350}}$ <sup>c</sup> | $\Phi_{\text{ex465}}$ <sup>c</sup> |
|------------------|---------------------------------|----------------------------------------------|----------------------------------------------|--------------------------------|------------------------------------|------------------------------------|
| Complex <b>1</b> | CH <sub>3</sub> CN              | 373                                          | 497                                          | 509                            | 0.003                              | 0.005                              |
| Complex <b>2</b> | CH <sub>3</sub> CN              | 373                                          | 497                                          | 509                            | 0.020                              | 0.027                              |
| H <sub>2</sub> L | CH <sub>3</sub> CN              | 374                                          | 497                                          | 509                            | 0.030±0.006                        | 0.038                              |
|                  | CH <sub>2</sub> Cl <sub>2</sub> | 375                                          | 501                                          | 512                            | 0.42±0.08                          | 0.39                               |
|                  | Toluene                         | 375                                          | 504                                          | 515 (435) <sup>d</sup>         | 0.57±0.07                          | 0.55                               |
|                  | THF                             | 375                                          | 501                                          | 511                            | —                                  | —                                  |

<sup>a</sup>The anthracene moiety. <sup>b</sup>The BODIPY moiety. <sup>c</sup>The fluorescence quantum yields were determined using fluorescein as a standard ( $\Phi = 0.85$  in carbonate-bicarbonate buffer at a pH of about 9.6)

<sup>d</sup>Fluorescence band was observed in toluene at excitation at 350 nm.

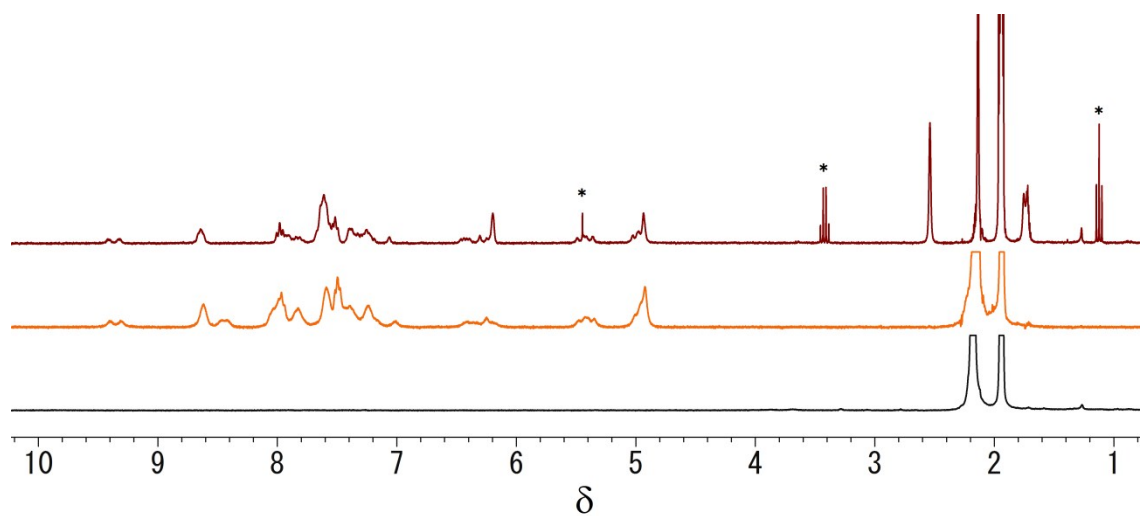

**Fig. S3**  $^1\text{H}$  NMR spectra (300 MHz,  $\text{CD}_3\text{CN}$ ) of complexes **1** (top), **1'** (middle) and **2** (bottom) (\* solvent).

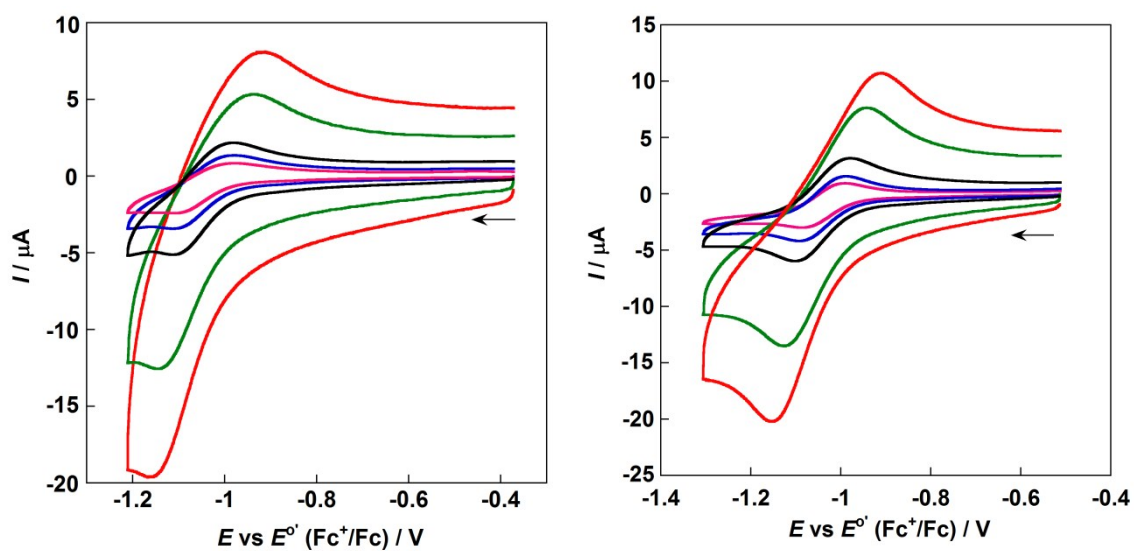

**Fig. S4** The reduction processes of complexes **1** (left) and **1'** (right) in  $\text{CH}_3\text{CN}$  containing 0.10 M  $\text{Bu}_4\text{NPF}_6$  recorded at scan rates of 25 (—), 50 (—), 100 (—), 500 (—), and 1000 (—)  $\text{mV s}^{-1}$ : working electrode, glassy carbon; auxiliary electrode, platinum wire; reference electrode,  $\text{Ag}/\text{Ag}^+$ . Potentials are versus ferrocenium/ferrocene ( $\text{Fc}^+/\text{Fc}$ ).

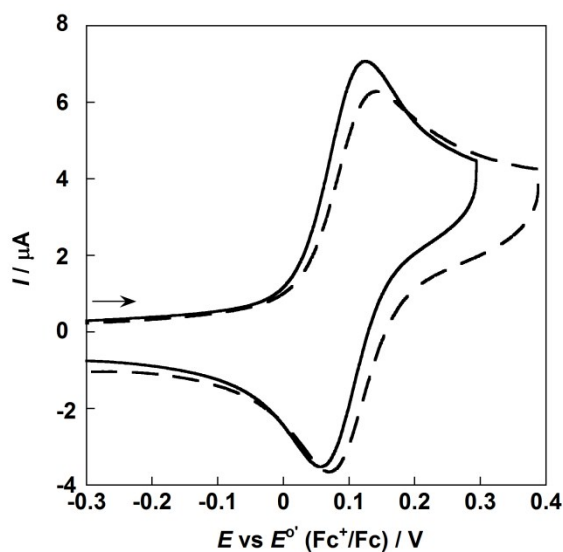

**Fig. S5** The oxidation processes of complexes **1** (---) and **1'** (—) in CH<sub>3</sub>CN containing 0.10 M Bu<sub>4</sub>NPF<sub>6</sub> recorded at a scan rate of 100 mV s<sup>-1</sup>: working electrode, glassy carbon; auxiliary electrode, platinum wire; reference electrode, Ag/Ag<sup>+</sup>. Potentials are versus ferrocenium/ferrocene (Fc<sup>+</sup>/Fc).

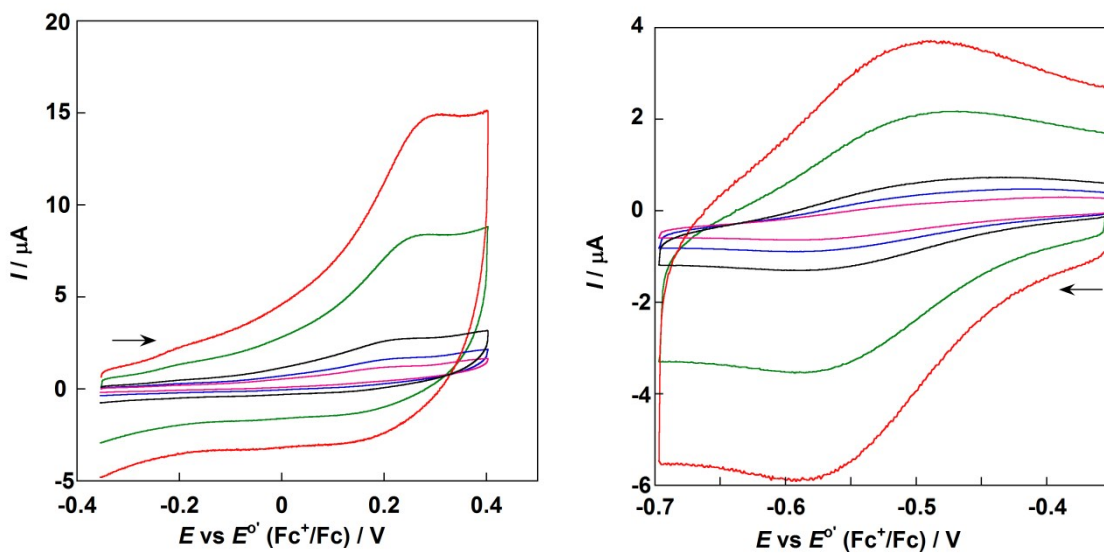

**Fig. S6** The oxidation (left) and reduction (right) processes of complex **2** in CH<sub>3</sub>CN containing 0.10 M Bu<sub>4</sub>NPF<sub>6</sub> recorded at scan rates of 25 (—), 50 (—), 100 (—), 500 (—), and 1000 (—) mV s<sup>-1</sup>: working electrode, glassy carbon; auxiliary electrode, platinum wire; reference electrode, Ag/Ag<sup>+</sup>. Potentials are versus ferrocenium/ferrocene (Fc<sup>+</sup>/Fc).

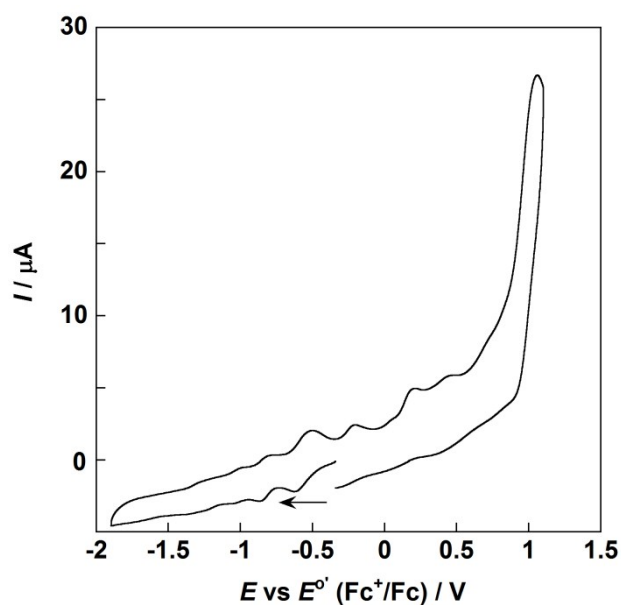

**Fig. S7** Cyclic voltammogram of **2'** (—) in CH<sub>3</sub>CN containing 0.10 M Bu<sub>4</sub>NPF<sub>6</sub> recorded at a scan rate of 100 mV s<sup>-1</sup>: working electrode, glassy carbon; auxiliary electrode, platinum wire; reference electrode, Ag/Ag<sup>+</sup>. Potentials are versus ferrocenium/ferrocene (Fc<sup>+</sup>/Fc).

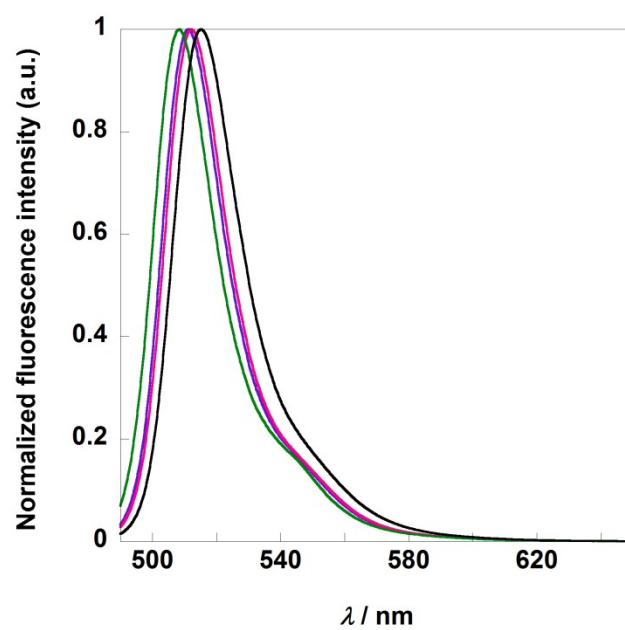

**Fig. S8** Normalized fluorescence spectra of H<sub>2</sub>L in several solutions: CH<sub>3</sub>CN, (—); CH<sub>2</sub>Cl<sub>2</sub>, (—); toluene, (—); THF, (—). Excitation wavelength = 470 nm.

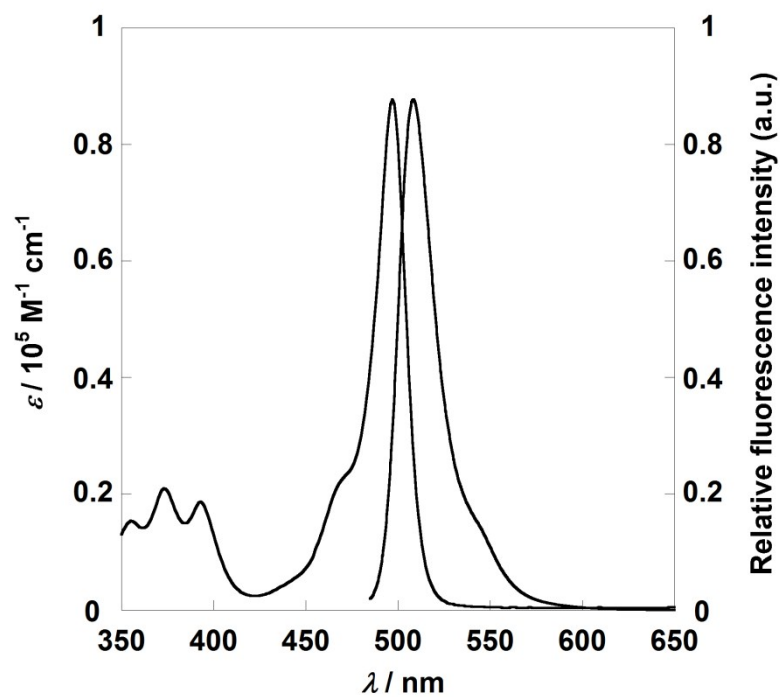

**Fig. S9** Absorption and fluorescence spectra of  $\text{H}_2\text{L}$  in  $\text{CH}_3\text{CN}$ .

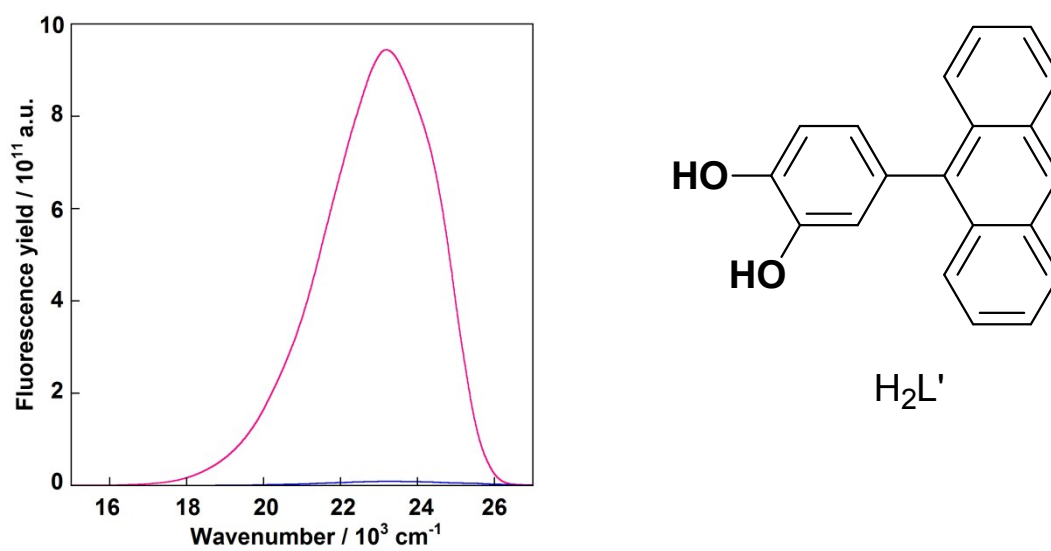

**Fig. S10** Fluorescence spectra of  $\text{H}_2\text{L}'$  (—), complex  $\mathbf{1}'$  (—) in 350 nm excitation wavelength. Solvent:  $\text{CH}_3\text{CN}$ .

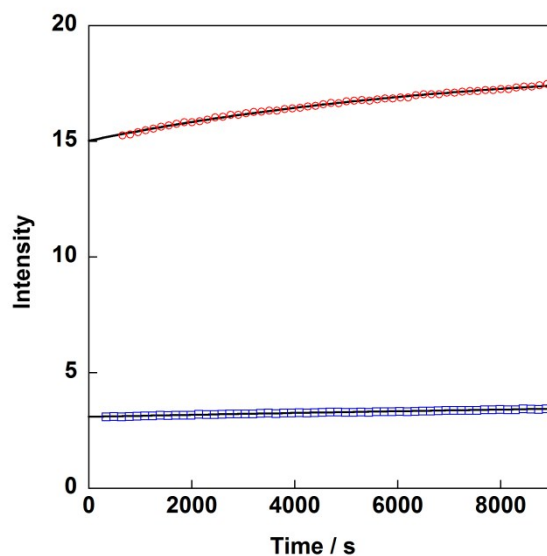

**Fig. S11** Time variations of fluorescence intensity of complexes **1** ( $\square$ ) and **2** ( $\circ$ );  $\lambda_{\text{ex}} = 470$  nm, maximum fluorescence intensity (508 nm monitored) of emission spectra in  $\text{CH}_3\text{CN}$  over 9000 s.

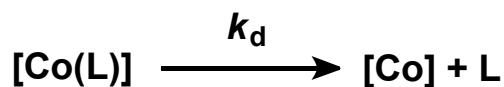

**Scheme S1.** A simple model for ligand dissociation.

$$[\text{Int}] = [\text{Int}]_0 + C[1 - \exp(-k_d t)] \quad (\text{S1})$$

The  $[\text{Int}]$ ,  $[\text{Int}]_0$ ,  $C$ ,  $k_d$ , and  $t$  represent the fluorescence intensity, the deduced stating value, the species dependent value, the dissociation rate constant, and time, respectively

**Table S2** The obtained values by using equation (S1).

|                  | $[\text{Int}]_0$ | $C$  | $k_d$                                | $R^2$   |
|------------------|------------------|------|--------------------------------------|---------|
| Complex <b>1</b> | 3.10             | 1.49 | $2.93 \times 10^{-5} \text{ s}^{-1}$ | 0.98677 |
| Complex <b>2</b> | 15.0             | 3.36 | $1.38 \times 10^{-4} \text{ s}^{-1}$ | 0.99706 |



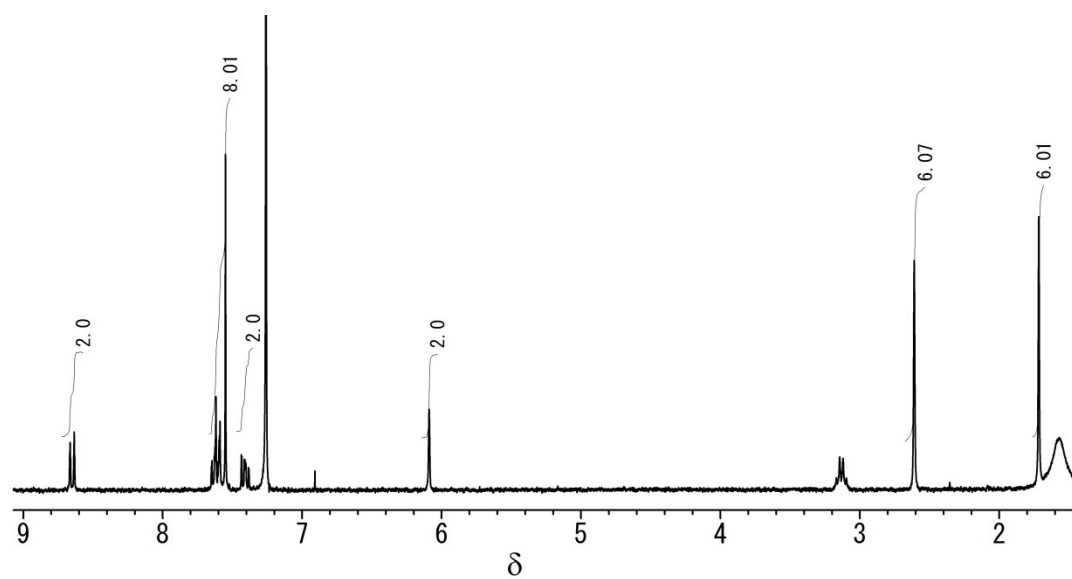

**Fig. S12**  $^1\text{H}$  NMR spectrum (300 MHz,  $\text{CDCl}_3$ ) of (i).

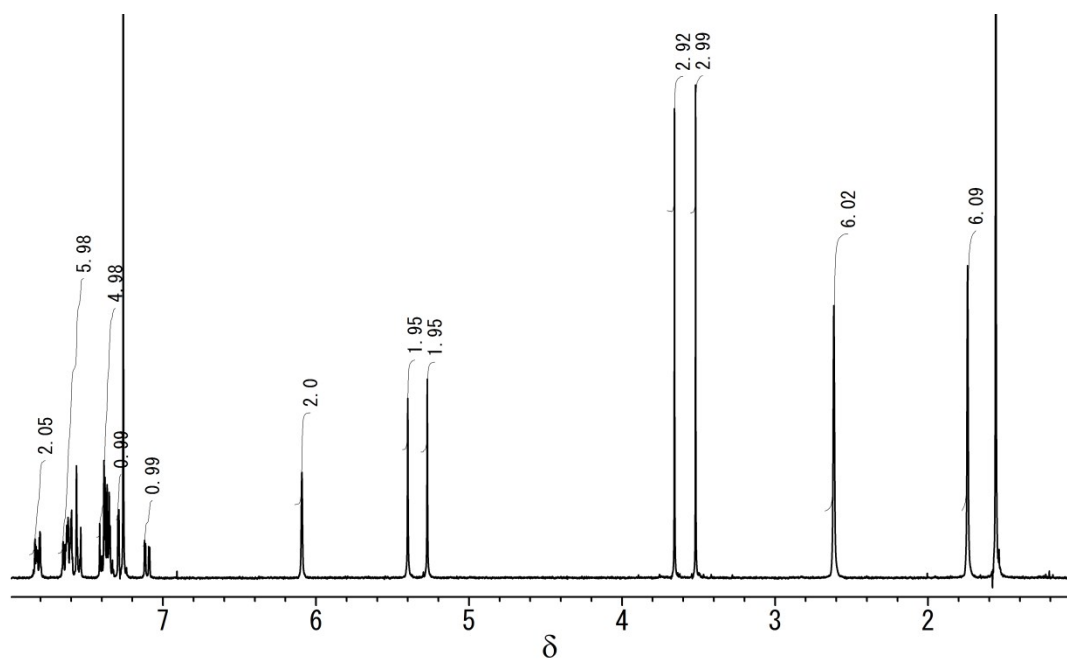

**Fig. S13**  $^1\text{H}$  NMR spectrum (300 MHz,  $\text{CDCl}_3$ ) of (ii).

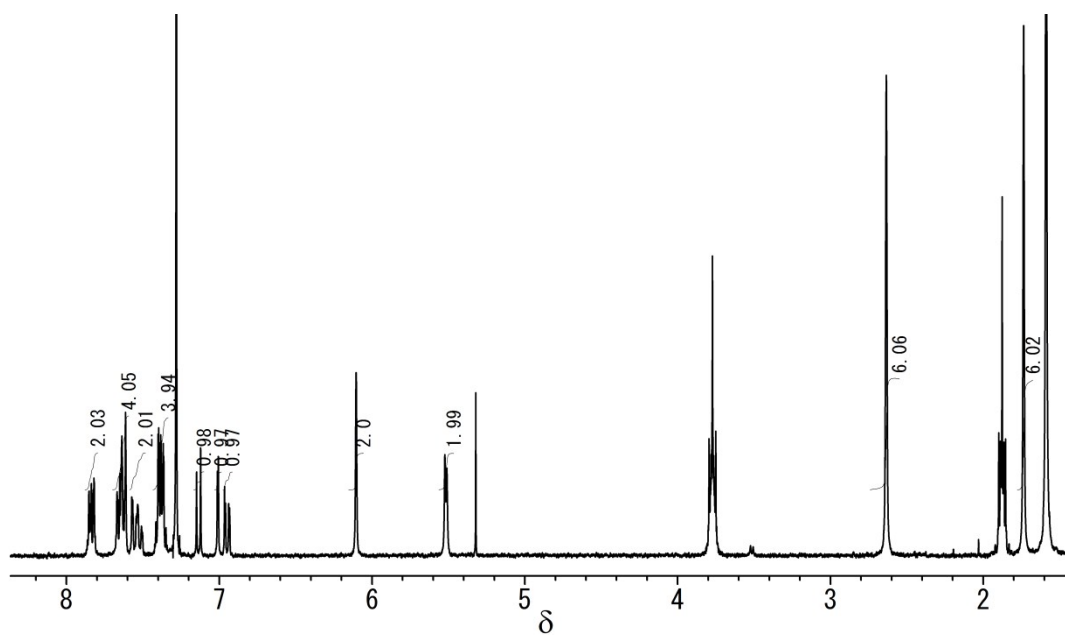

**Fig. S14**  $^1\text{H}$  NMR spectrum (300 MHz,  $\text{CDCl}_3$ ) of  $\text{H}_2\text{L}$ .

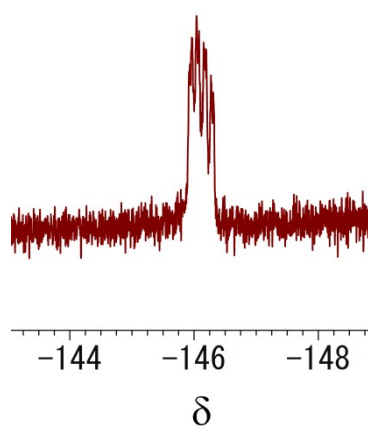

**Fig. S15**  $^{19}\text{F}$  NMR spectrum (282.4 MHz,  $\text{CDCl}_3$ ) of  $\text{H}_2\text{L}$ .
